# Supplementary material for: New Perspectives on Sex Steroid Hormones Signaling in Cancer-Associated Fibroblasts of Non-Small Cell Lung Cancer
Source: MDPI journal article supplement (doi:10.3390/cancers15143620), 2023-07-14
Supplement: s1 [file s1]

# Supplemental figure S1

Age-standardized rate (World) per 100 000, incidence, males and females, age [20-49], in 2012  
Lung

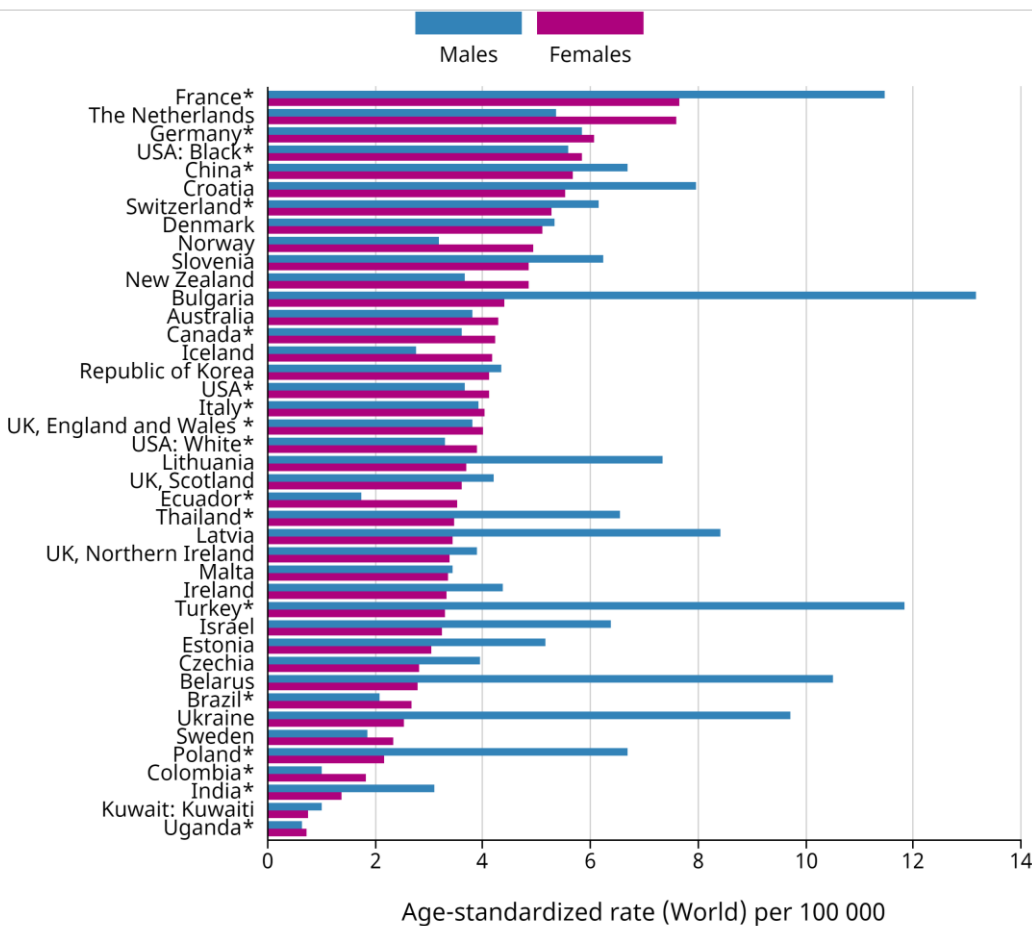

Age-standardized rate (World) per 100 000, incidence, males and females, age [50-85+], in 2012  
Lung

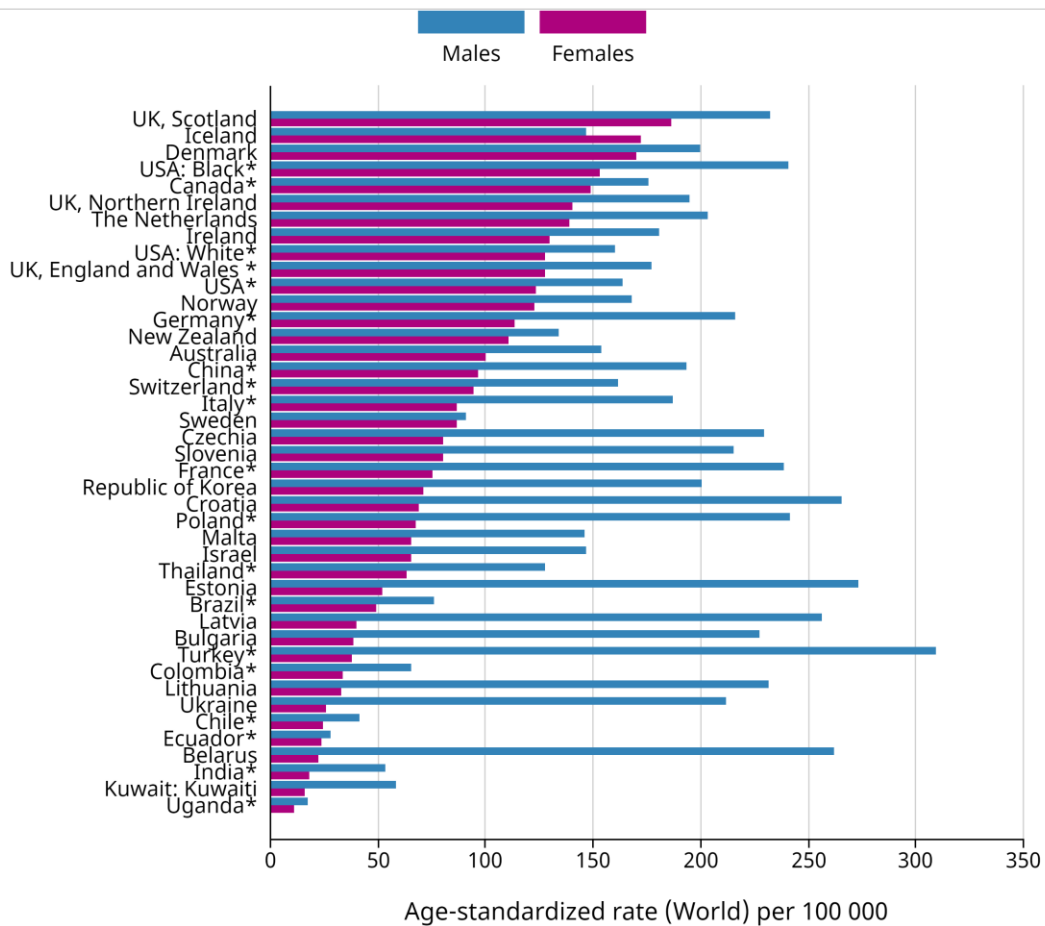

\* Subnational data  
Cancer Over time | IARC - All Rights Reserved 2023 - Data version: 1.0

Supplemental figure S1: Age-standadaized rate per 100 000 of the incidence of lung among men and women aged 20-40 (left) and 50 and older (right).  
**Data source and Graph production:** Ervik M, Lam F, Laversanne M, Ferlay J, Bray F (2021). Global Cancer Observatory: Cancer Over Time. Lyon, France: International Agency for Research on Cancer. Available from: <https://gco.iarc.fr/overtime> , accessed 08 June 2023.
